# Supplementary material for: The Differential Expression of Aqueous Soluble Proteins in Breast Normal and Cancerous Tissues in Relation to Stage and Grade of Patients
Source: Hindawi journal article supplement (doi:10.1155/2010/516469), 2010-01-01
Supplement: f1 [file 516469.f1.pdf]

Supplement 1a: The expressions of protein spots for a) SEC13-like 1, b) calreticulin, c) 14-3-3 protein eta and d) 14-3-3 protein zeta in relation to estrogen receptor, progesterone receptor, C-ERB-B<sub>2</sub> -oncoprotein status and triple negative status by grade for all patients.

| Grade                | Grade II |      |      | Grade III |      |      |
|----------------------|----------|------|------|-----------|------|------|
| Hormone              | Up       | Same | Down | Up        | Same | Down |
| receptor             |          |      |      |           |      |      |
| Estrogen             | 4/5      | 0/5  | 0/5  | 3/3       | 0/3  | 0/3  |
| receptor positive    |          |      |      |           |      |      |
| Estrogen             | 2/2      | 0/2  | 0/2  | 4/6       | 0/6  | 0/6  |
| receptor negative    |          |      |      |           |      |      |
| Progesterone         | 3/4      | 0/4  | 0/4  | 1/1       | 0/1  | 0/1  |
| receptor positive    |          |      |      |           |      |      |
| Progesterone         | 3/3      | 0/3  | 0/3  | 6/8       | 0/8  | 0/8  |
| receptor negative    |          |      |      |           |      |      |
| C-ERB-B <sub>2</sub> | 1/2      | 0/2  | 0/2  | 3/3       | 0/3  | 0/3  |
| positive             |          |      |      |           |      |      |
| C-ERB-B <sub>2</sub> | 5/5      | 0/5  | 0/5  | 4/6       | 0/6  | 0/6  |
| negative             |          |      |      |           |      |      |
| Triple negative      | 1/1      | 0/1  | 0/1  | 2/4       | 0/4  | 0/4  |
| Non Triple           | 5/6      | 0/6  | 0/6  | 5/5       | 0/5  | 0/5  |
| negative             |          |      |      |           |      |      |

b) Calreticulin

| Grade                | Grade II |      |      | Grade III |      |      |
|----------------------|----------|------|------|-----------|------|------|
| Hormone              | Up       | Same | Down | Up        | Same | Down |
| receptor             |          |      |      |           |      |      |
| Estrogen             | 5/5      | 0/5  | 0/5  | 3/3       | 0/3  | 0/3  |
| receptor positive    |          |      |      |           |      |      |
| Estrogen             | 2/2      | 0/2  | 0/2  | 5/6       | 0/6  | 0/6  |
| receptor negative    |          |      |      |           |      |      |
| Progesterone         | 4/4      | 0/4  | 0/4  | 1/1       | 0/1  | 0/1  |
| receptor positive    |          |      |      |           |      |      |
| Progesterone         | 3/3      | 0/3  | 0/3  | 7/8       | 0/8  | 0/8  |
| receptor negative    |          |      |      |           |      |      |
| C-ERB-B <sub>2</sub> | 2/2      | 0/2  | 0/2  | 3/3       | 0/3  | 0/3  |
| positive             |          |      |      |           |      |      |
| C-ERB-B <sub>2</sub> | 5/5      | 0/5  | 0/5  | 5/6       | 0/6  | 0/6  |
| negative             |          |      |      |           |      |      |
| Triple negative      | 1/1      | 0/1  | 0/1  | 3/4       | 0/4  | 0/4  |
| Non Triple           | 6/6      | 0/6  | 0/6  | 5/5       | 0/5  | 0/5  |
| negative             |          |      |      |           |      |      |

c) 14-3-3 protein zeta

| Grade                | Grade II |      |      | Grade III |      |      |
|----------------------|----------|------|------|-----------|------|------|
| Hormone              | Up       | Same | Down | Up        | Same | Down |
| receptor             |          |      |      |           |      |      |
| Estrogen             | 4/5      | 0/5  | 0/5  | 3/3       | 0/3  | 0/3  |
| receptor positive    |          |      |      |           |      |      |
| Estrogen             | 1/2      | 0/2  | 0/2  | 6/6       | 0/6  | 0/6  |
| receptor negative    |          |      |      |           |      |      |
| Progesterone         | 3/4      | 0/4  | 0/4  | 1/1       | 0/1  | 0/1  |
| receptor positive    |          |      |      |           |      |      |
| Progesterone         | 2/3      | 0/3  | 0/3  | 8/8       | 0/8  | 0/8  |
| receptor negative    |          |      |      |           |      |      |
| C-ERB-B <sub>2</sub> | 1/2      | 0/2  | 0/2  | 3/3       | 0/3  | 0/3  |
| positive             |          |      |      |           |      |      |
| C-ERB-B <sub>2</sub> | 4/5      | 0/5  | 0/5  | 6/6       | 0/6  | 0/6  |
| negative             |          |      |      |           |      |      |
| Triple negative      | 0/1      | 0/1  | 0/1  | 4/4       | 0/4  | 0/4  |
| Non Triple           | 5/6      | 0/6  | 0/6  | 5/5       | 0/5  | 0/5  |
| negative             |          |      |      |           |      |      |

d) 14-3-3 protein eta

| Grade                | Grade II |      |      | Grade III |      |      |
|----------------------|----------|------|------|-----------|------|------|
| Hormone              | Up       | Same | Down | Up        | Same | Down |
| receptor             |          |      |      |           |      |      |
| Estrogen             | 3/5      | 1/5  | 0/5  | 3/3       | 0/3  | 0/3  |
| receptor positive    |          |      |      |           |      |      |
| Estrogen             | 1/2      | 0/2  | 0/2  | 6/6       | 0/6  | 0/6  |
| receptor negative    |          |      |      |           |      |      |
| Progesterone         | 3/4      | 0/4  | 0/4  | 1/1       | 0/1  | 0/1  |
| receptor positive    |          |      |      |           |      |      |
| Progesterone         | 1/3      | 1/3  | 0/3  | 8/8       | 0/8  | 0/8  |
| receptor negative    |          |      |      |           |      |      |
| C-ERB-B <sub>2</sub> | 1/2      | 0/2  | 0/2  | 3/3       | 0/3  | 0/3  |
| positive             |          |      |      |           |      |      |
| C-ERB-B <sub>2</sub> | 3/5      | 1/5  | 0/5  | 6/6       | 0/6  | 0/6  |
| negative             |          |      |      |           |      |      |
| Triple negative      | 0/1      | 0/1  | 0/1  | 4/4       | 0/4  | 0/4  |
| Non Triple           | 4/6      | 1/6  | 0/6  | 5/5       | 0/5  | 0/5  |
| negative             |          |      |      |           |      |      |

Supplement 1b: The expressions of protein spots for a) SEC13-like 1, b) calreticulin, c) 14-3-3 protein eta and d) 14-3-3 protein zeta in relation to estrogen receptor, progesterone receptor, C-ERB-B<sub>2</sub> -oncoprotein status and triple negative status by stage.

| Stage                | Stage II |      |      | Stage III |      |      |
|----------------------|----------|------|------|-----------|------|------|
| Hormone              | Up       | Same | Down | Up        | Same | Down |
| receptor             |          |      |      |           |      |      |
| Estrogen             | 2/2      | 0/2  | 0/2  | 6/7       | 0/7  | 0/7  |
| receptor positive    |          |      |      |           |      |      |
| Estrogen             | 3/5      | 0/5  | 0/5  | 3/3       | 0/3  | 0/3  |
| receptor negative    |          |      |      |           |      |      |
| Progesterone         | 0/0      | 0/0  | 0/0  | 6/7       | 0/7  | 0/7  |
| receptor positive    |          |      |      |           |      |      |
| Progesterone         | 5/7      | 0/7  | 0/7  | 3/3       | 0/3  | 0/3  |
| receptor negative    |          |      |      |           |      |      |
| C-ERB-B <sub>2</sub> | 2/2      | 0/2  | 0/2  | 3/4       | 0/4  | 0/4  |
| positive             |          |      |      |           |      |      |
| C-ERB-B <sub>2</sub> | 3/5      | 0/5  | 0/5  | 6/6       | 0/6  | 0/6  |
| negative             |          |      |      |           |      |      |
| Triple negative      | 2/4      | 0/4  | 0/4  | 1/1       | 0/1  | 0/1  |
| Non Triple           | 3/3      | 0/3  | 0/3  | 8/9       | 0/9  | 0/9  |
| negative             |          |      |      |           |      |      |

b) Calreticulin

| Stage | Stage II |  |  | Stage III |  |  |
|-------|----------|--|--|-----------|--|--|
|-------|----------|--|--|-----------|--|--|

| Hormone              | Up  | Same | Down | Up  | Same | Down |
|----------------------|-----|------|------|-----|------|------|
| receptor             |     |      |      |     |      |      |
| Estrogen             | 2/2 | 0/2  | 0/2  | 7/7 | 0/7  | 0/7  |
| receptor positive    |     |      |      |     |      |      |
| Estrogen             | 4/5 | 0/5  | 0/5  | 3/3 | 0/3  | 0/3  |
| receptor negative    |     |      |      |     |      |      |
| Progesterone         | 0/0 | 0/0  | 0/0  | 7/7 | 0/7  | 0/7  |
| receptor positive    |     |      |      |     |      |      |
| Progesterone         | 6/7 | 0/7  | 0/7  | 3/3 | 0/3  | 0/3  |
| receptor negative    |     |      |      |     |      |      |
| C-ERB-B <sub>2</sub> | 2/2 | 0/2  | 0/2  | 4/4 | 0/4  | 0/4  |
| positive             |     |      |      |     |      |      |
| C-ERB-B <sub>2</sub> | 4/5 | 0/5  | 0/5  | 6/6 | 0/6  | 0/6  |
| negative             |     |      |      |     |      |      |
| Triple negative      | 3/4 | 0/4  | 0/4  | 1/1 | 0/1  | 0/1  |
| Non Triple           | 3/3 | 0/3  | 0/3  | 9/9 | 0/9  | 0/9  |
| negative             |     |      |      |     |      |      |

c) 14-3-3 protein zeta

| Stage | Stage II | Stage III |
|-------|----------|-----------|
|-------|----------|-----------|

| Hormone              | Up  | Same | Down | Up  | Same | Down |
|----------------------|-----|------|------|-----|------|------|
| receptor             |     |      |      |     |      |      |
| Estrogen             | 2/2 | 0/2  | 0/2  | 6/7 | 0/7  | 0/7  |
| receptor positive    |     |      |      |     |      |      |
| Estrogen             | 5/5 | 0/5  | 0/5  | 2/3 | 0/3  | 0/3  |
| receptor negative    |     |      |      |     |      |      |
| Progesterone         | 0/0 | 0/0  | 0/0  | 6/7 | 0/7  | 0/7  |
| receptor positive    |     |      |      |     |      |      |
| Progesterone         | 7/7 | 0/7  | 0/7  | 2/3 | 0/3  | 0/3  |
| receptor negative    |     |      |      |     |      |      |
| C-ERB-B <sub>2</sub> | 2/2 | 0/2  | 0/2  | 3/4 | 0/4  | 0/4  |
| positive             |     |      |      |     |      |      |
| C-ERB-B <sub>2</sub> | 5/5 | 0/5  | 0/5  | 5/6 | 0/6  | 0/6  |
| negative             |     |      |      |     |      |      |
| Triple negative      | 4/4 | 0/4  | 0/4  | 0/1 | 0/1  | 0/1  |
| Non Triple           | 3/3 | 0/3  | 0/3  | 8/9 | 0/9  | 0/9  |
| negative             |     |      |      |     |      |      |

d) 14-3-3 protein eta

| Stage | Stage II | Stage III |
|-------|----------|-----------|
|-------|----------|-----------|

| Hormone              | Up  | Same | Down | Up  | Same | Down |
|----------------------|-----|------|------|-----|------|------|
| receptor             |     |      |      |     |      |      |
| Estrogen             | 2/2 | 0/2  | 0/2  | 6/7 | 0/7  | 0/7  |
| receptor positive    |     |      |      |     |      |      |
| Estrogen             | 4/5 | 1/5  | 0/5  | 2/3 | 0/3  | 0/3  |
| receptor negative    |     |      |      |     |      |      |
| Progesterone         | 0/0 | 0/0  | 0/0  | 6/7 | 0/7  | 0/7  |
| receptor positive    |     |      |      |     |      |      |
| Progesterone         | 6/7 | 1/7  | 0/7  | 2/3 | 0/3  | 0/3  |
| receptor negative    |     |      |      |     |      |      |
| C-ERB-B <sub>2</sub> | 2/2 | 0/2  | 0/2  | 3/4 | 0/4  | 0/4  |
| positive             |     |      |      |     |      |      |
| C-ERB-B <sub>2</sub> | 4/5 | 1/5  | 0/5  | 5/6 | 0/6  | 0/6  |
| negative             |     |      |      |     |      |      |
| Triple negative      | 4/4 | 0/4  | 0/4  | 0/1 | 0/1  | 0/1  |
| Non Triple           | 2/3 | 1/3  | 0/3  | 8/9 | 0/9  | 0/9  |
| negative             |     |      |      |     |      |      |
